# Supplementary material for: Seed-mediated construction of bimetallic FeCo clusters on N-doped mesoporous carbon for bifunctional electrocatalysis in rechargeable Zn–air batteries
Source: Royal Society of Chemistry journal article supplement (doi:10.1039/d5ta07901b), 2026-01-01
Supplement: d5ta07901b1.pdf [file d5ta07901b1.pdf]

## Supporting Information

### **Seed-mediated construction of bimetallic FeCo clusters on N-doped mesoporous carbon for bifunctional electrocatalysis in rechargeable Zn-air batteries**

Yilun Zhao<sup>a,c,d,e,#</sup>, Mengwei Duan<sup>b,#</sup>, Zhengbin Tian<sup>a,c,d,\*</sup>, Wenquan Wang<sup>a,c,d,e</sup>, Xiaohui Deng<sup>a,c,d</sup>, Bing Yu<sup>b,\*</sup> and Guang-Hui Wang<sup>c,c,d,e\*</sup>

<sup>a</sup> Qingdao Institute of Bioenergy and Bioprocess Technology, Chinese Academy of Sciences, Qingdao 266101, China

<sup>b</sup> College of Chemistry and Chemical Engineering, Institute of Biomedical Materials and Engineering, Qingdao University, Qingdao 266071, China

<sup>c</sup> Shandong Energy Institute, Qingdao 266101, China

<sup>d</sup> Qingdao New Energy Shandong Laboratory, Qingdao 266101, China

<sup>e</sup> University of Chinese Academy of Sciences, Beijing 100049, China

<sup>#</sup> These authors contribute equally to this work.

\* Corresponding author. Email: wanggh@qibebt.ac.cn; yubing198@qdu.edu.cn; tianzb@qibebt.ac.cn.

## Experimental section

### Materials

All chemicals are of analytical grade and used without further purification. 3-aminophenol (3-AP) was obtained from J&K Chemicals Technology Co. Ltd. Pluronic® F127 (PEO<sub>106</sub>-PPO<sub>70</sub>-PEO<sub>106</sub>) was purchased from Sigma-Aldrich (St. Louis, MO, USA). Co. Ltd (Shanghai, China). Oleic acid (OA), hexamethylenetetramine (HMT), K<sub>3</sub>[Co(CN)<sub>6</sub>], and K<sub>3</sub>[Fe(CN)<sub>6</sub>] were obtained from Sinopharm Chemical Reagent. Co. Ltd (Shanghai, China). The commercial Pt/C (20%) catalyst was obtained from Johnson Matthey. The commercial RuO<sub>2</sub> (20%) catalyst was obtained from Macklin Biochemical Co. Ltd (Shanghai, China). The Nafion solution (5 wt%) was obtained from DuPont.

### Materials characterization

The morphology of samples was examined by ZEISS GeminiSEM 360 microscope (SEM) and Hitachi-7650 transmission electron microscope (TEM) with an acceleration voltage of 10 kV and 100 kV, respectively. High-resolution transmission electron microscope (HRTEM) images, high-angle annular dark field scanning transmission electron microscope (HAADF-STEM) images and elemental mapping images were recorded on FEI Talos F200S instrument at an acceleration voltage of 200 kV. X-ray diffraction (XRD) patterns were measured at room temperature using a Bruker D8 Advance X-ray diffractometer at 40 kV and 40 mA with Cu K $\alpha$  radiation ( $\lambda = 1.5406 \text{ \AA}$ ). X-ray photoelectron spectroscopy (XPS) measurements were conducted on a Thermo Scientific K-Alpha using Al K $\alpha$  ( $h\nu = 1486.6 \text{ eV}$ ) radiation equipped with 500  $\mu\text{m}$  X-ray spot at  $3 \times 10^{-10}$  mbar and all the binding energy data were calibrated by C 1s (284.6 eV). The peak fitting was analyzed using XPSPeak software with Shirley-type background and Lorentzian-Gaussian shapes and signals were referenced by Handbook of Monochromatic XPS Spectra. The metal contents of the samples were determined using an inductively coupled plasma-optical emission spectrophotometer (ICP-OES; Agilent 5110, USA). Nitrogen content was analyzed using a Vario EL cube elemental analyzer (Elementar, Germany). Nitrogen sorption isotherms were measured with a Micromeritics ASAP 2460 instrument at 77 K. Prior to the measurements, the sample was degassed at 200 °C for 6 h. The specific surface areas and pore size distribution curves were calculated from the adsorption branch.

## Electrochemical measurements

The electrochemical measurements were performed using a three-electrode system with a graphite electrode as the counter electrode, Ag/AgCl (saturated KCl solution) as the reference electrode, a rotating disk electrode (RDE) made of glassy carbon (GC, 4 mm in diameter) coated with the sample as the working electrode and an aqueous O<sub>2</sub>-saturated 0.1 M KOH solution for ORR or Ar-saturated 1 M KOH for OER as the electrolyte. All potentials were reported versus the standard reversible hydrogen electrode (RHE). The working electrodes were prepared as follows: 10 mg of sample was ultrasonically dispersed in 975  $\mu$ L of ethanol and 25  $\mu$ L of Nafion solution to obtain a homogeneous ink. Afterward, 5  $\mu$ L of the prepared catalyst ink (0.05 mg) was dropped on the polished electrode surface to achieve catalyst loadings of 0.4 mg cm<sup>-2</sup> for ORR and 0.7 mg cm<sup>-2</sup> for OER.

Linear sweep voltammetry (LSV) was performed with a scan rate of 10 mV s<sup>-1</sup> (5 mV s<sup>-1</sup> for OER) with 1600 rpm rotation speeds at room temperature for ORR. The ORR stability of the electrocatalysts was examined by accelerated deterioration tests (ADT) with a scan rate of 50 mV s<sup>-1</sup> for 5,000 cycles between 0.6 and 1.0 V (vs RHE). The electrochemical impedance spectroscopy data were collected for the electrodes at the half wave potential ( $E_{1/2}$ ).

Rotating ring-disk electrode (RRDE) measurements were conducted to investigate the H<sub>2</sub>O<sub>2</sub> yield and the electron transfer number ( $n$ ). The RRDE electrode was scanned at 10 mV s<sup>-1</sup> with the ring potential being kept at 1.25 V (vs RHE). The H<sub>2</sub>O<sub>2</sub> yield (H<sub>2</sub>O<sub>2</sub>%) and  $n$  were calculated by the following equations:

$$H_2O_2\% = 200 \times \frac{\frac{I_r}{N}}{\frac{I_r}{N} + I_d}$$

$$n = 4 \times \frac{I_d}{\frac{I_r}{N} + I_d}$$

where  $I_d$  is the disk current,  $I_r$  is the ring current, and  $N = 0.37$  is the current collection efficiency of the Pt ring.

## Re-ZABs Assembly and Measurements

The homemade Re-ZABs were assembled by using polished zinc foil (30 and 150  $\mu\text{m}$ ) as the anode and aqueous solution containing 6 M KOH with 0.2 M zinc acetate as the electrolyte. The as-prepared catalysts or commercial coated on carbon paper were used as the air cathode. The loading amount of the catalysts on carbon paper was 1.5  $\text{mg}/\text{cm}^2$  for both as-prepared catalysts and commercial catalysts. The discharge/charge polarization curves were measured using CHI 760E. For the cycling stability test, the Re-ZABs based on FeCo/SMC and Pt/C with  $\text{RuO}_2$  (with a mass ratio of 1:1) were assembled. The galvanostatic discharge/charge cycling stability for ZABs was measured using a LANE (CT3002A) instrument with 15 min for discharging and 15 min for charging under ambient conditions.

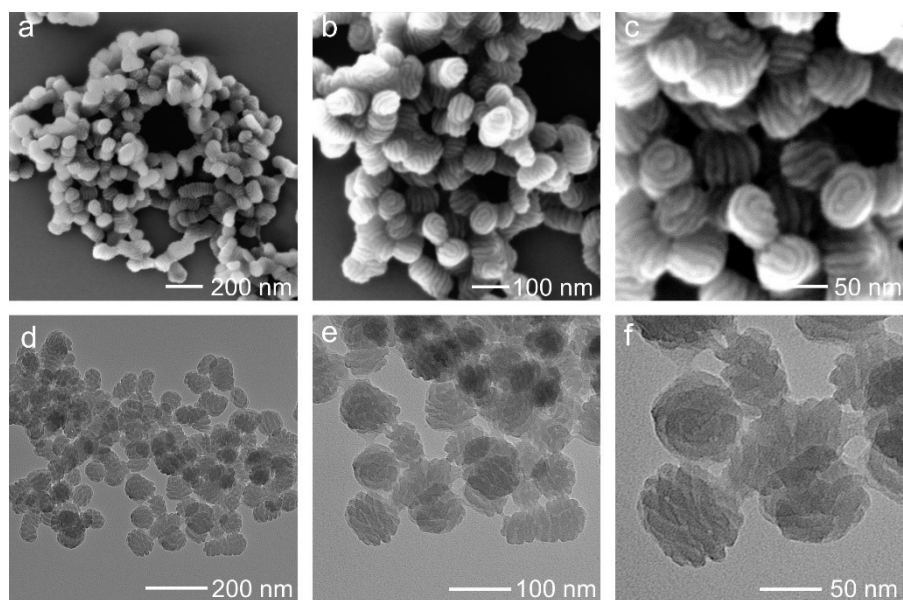

**Fig. S1.** (a-c) SEM and (d-f) TEM images of SMP.

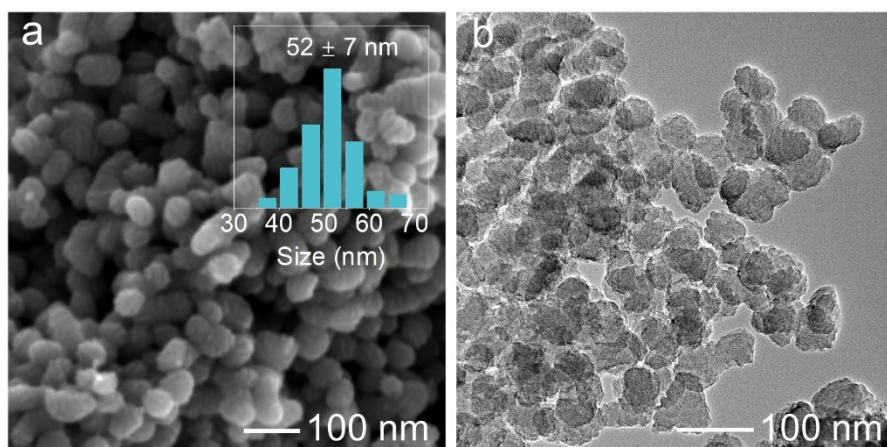

**Fig. S2.** (a) SEM and (b) TEM images of FeCo/SMC (inset in a is the size distribution of SMC).

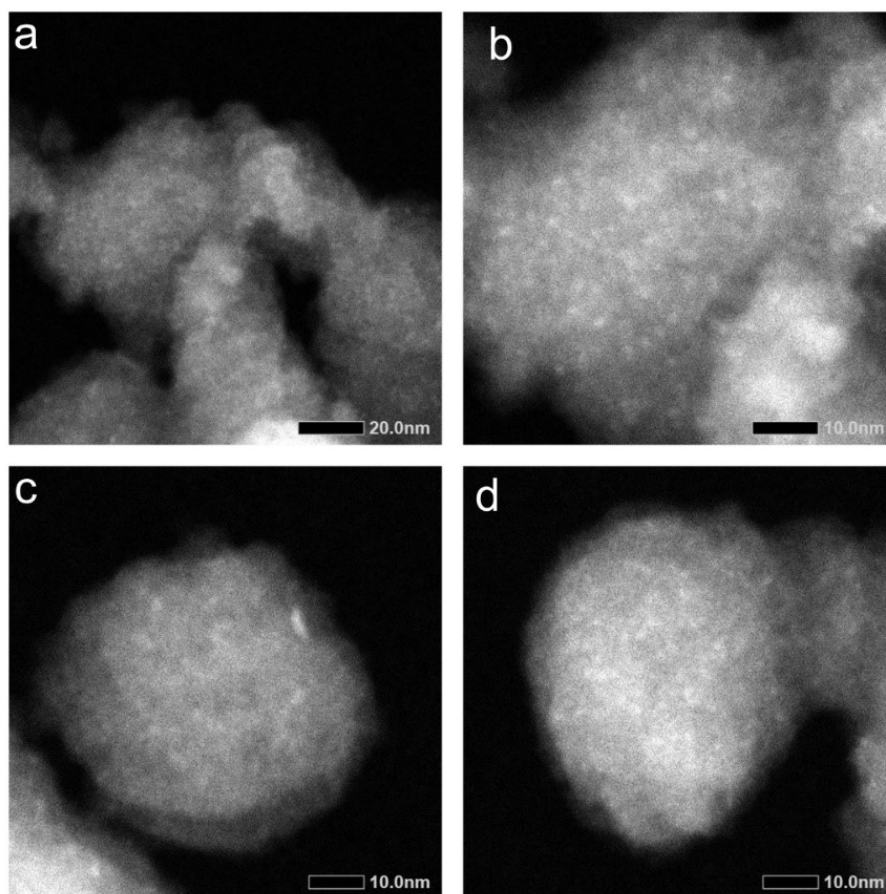

**Fig. S3.** HAADF-STEM images of FeCo/SMC.

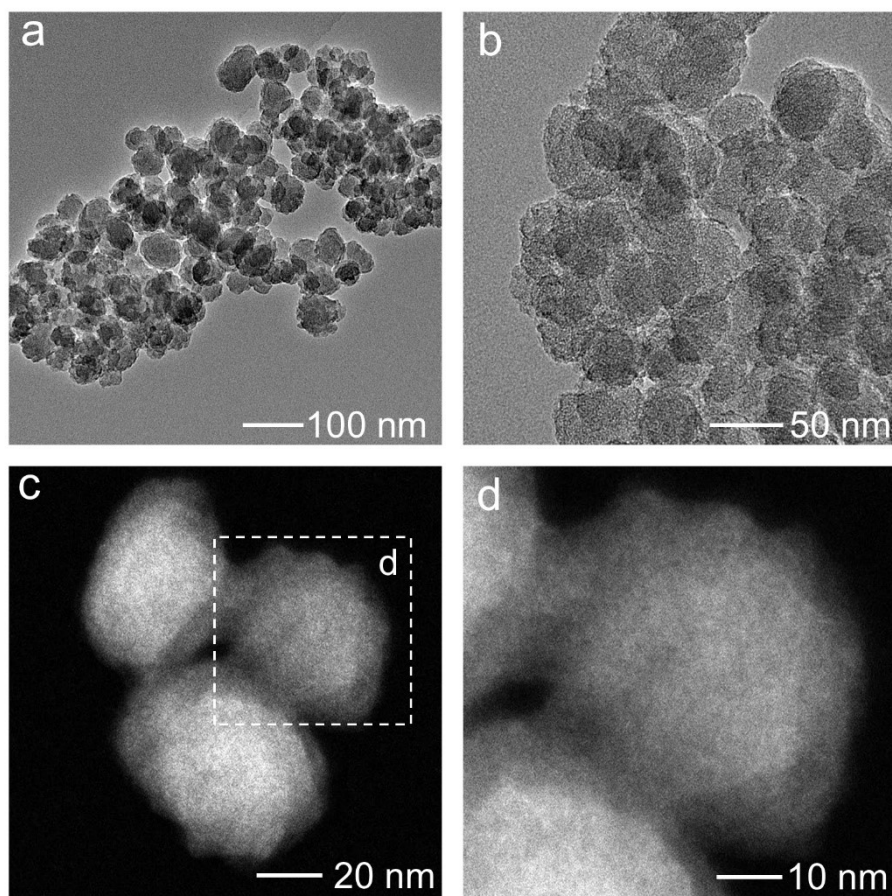

**Fig. S4.** (a,b) TEM and (c,d) HAADF-STEM images of  $\text{Co}_1/\text{SMC}$ .



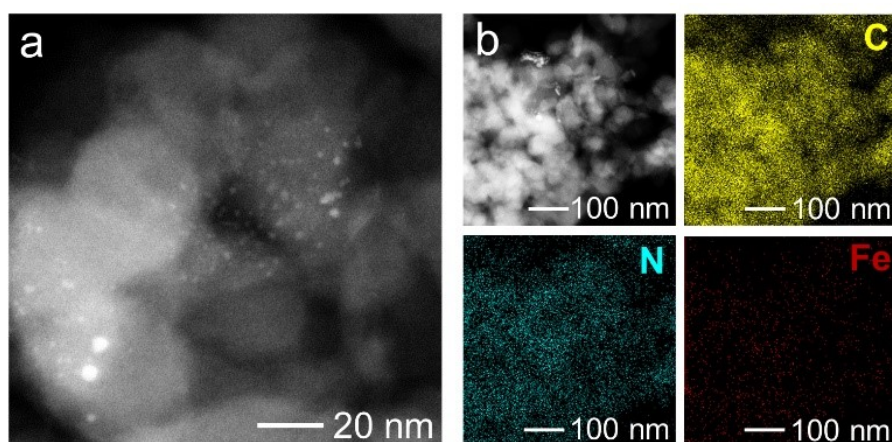

**Fig. S5.** HAADF-STEM and EDX elemental images of Fe-NPs/SMC.

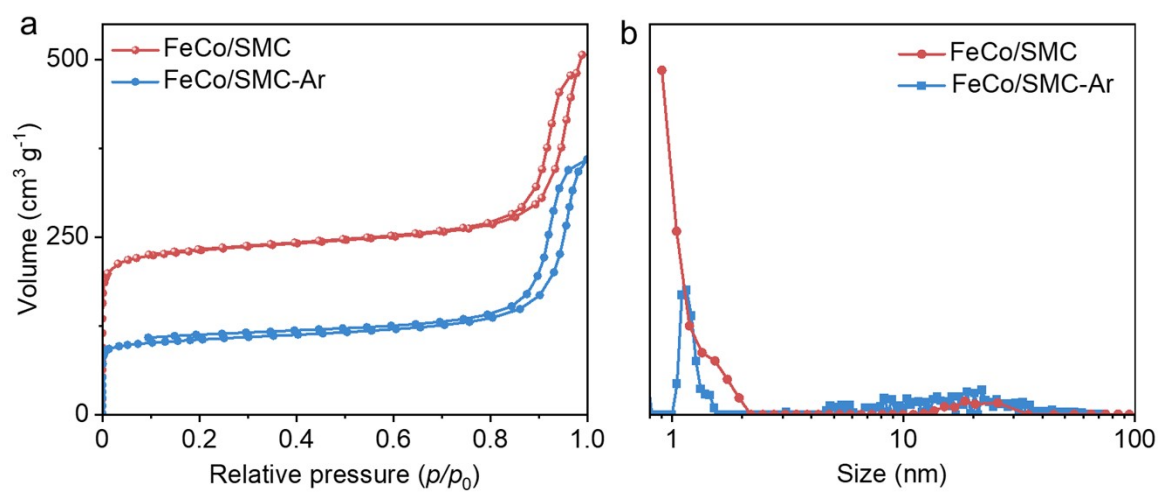

**Fig. S6.** (a)  $N_2$  sorption isotherms and (b) pore size distributions of FeCo/SMC and FeCo/SMC-Ar.

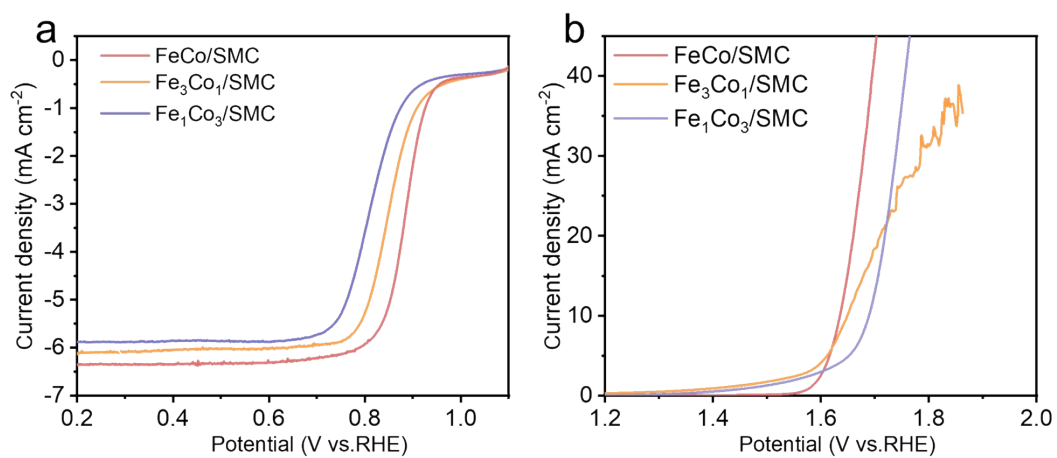

**Fig. S7.** ORR LSV curves and (b) OER LSV curves of Fe<sub>1</sub>Co<sub>3</sub>/SMC, Fe<sub>3</sub>Co<sub>1</sub>/SMC and FeCo/SMC.

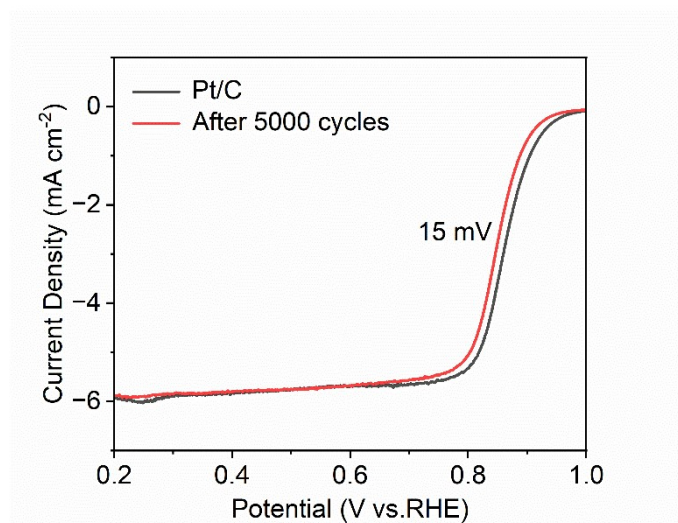

**Fig. S8.** ORR LSV curves of Pt/C before and after 5000 cycles.

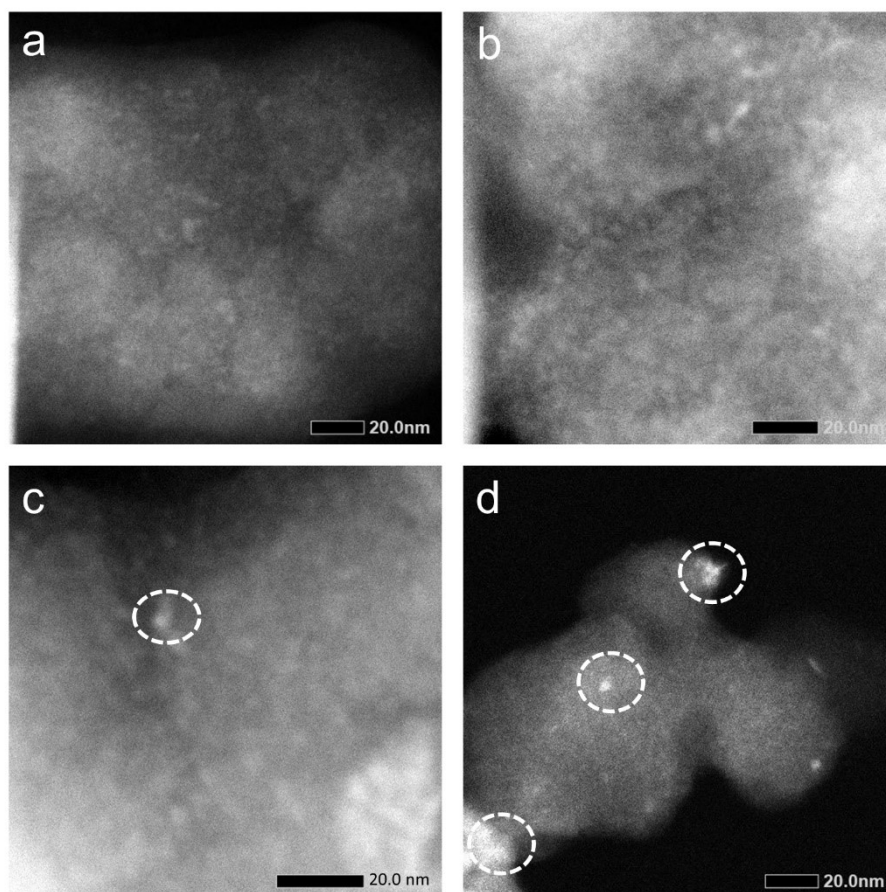

**Fig. S9.** HAADF-STEM images of FeCo/SMC after use.

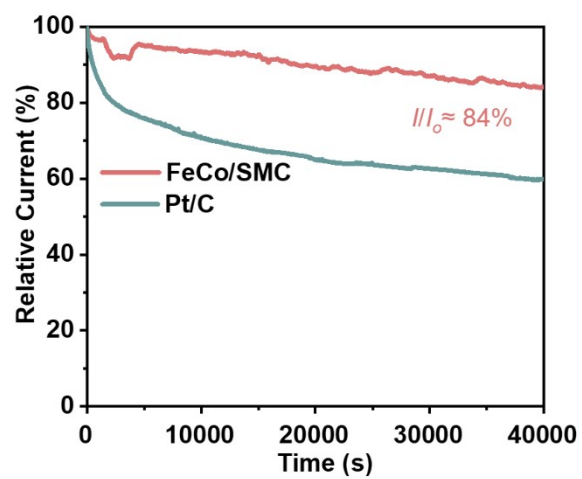

**Fig. S10.** Chronoamperometry curves of FeCo/SMC and Pt/C at 0.7 V vs RHE.

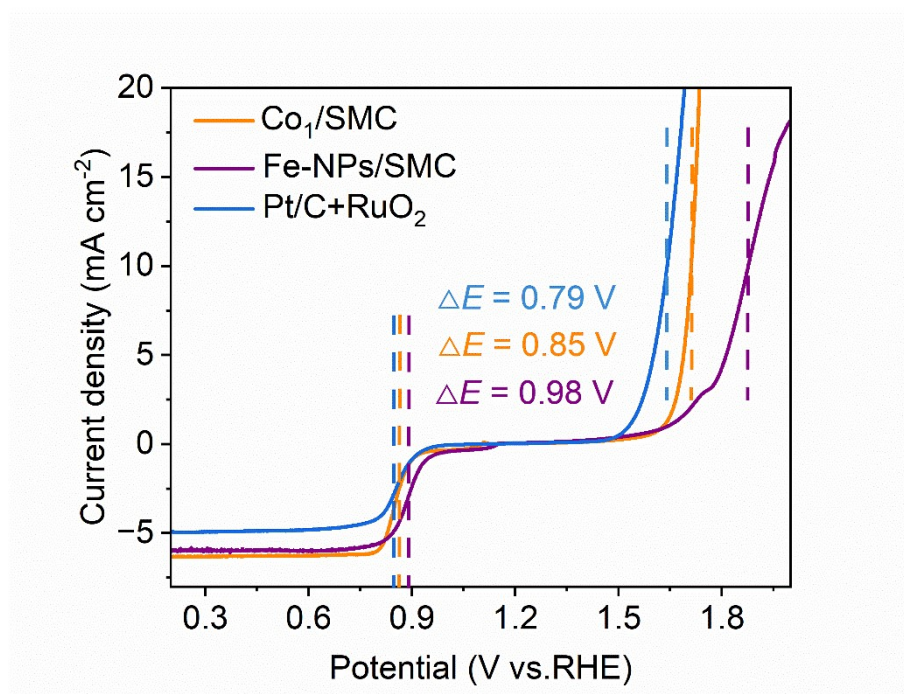

**Fig. S11.**  $\Delta E$  value of Co<sub>1</sub>/SMC, Fe-NPs/SMC and Pt/C+RuO<sub>2</sub>.

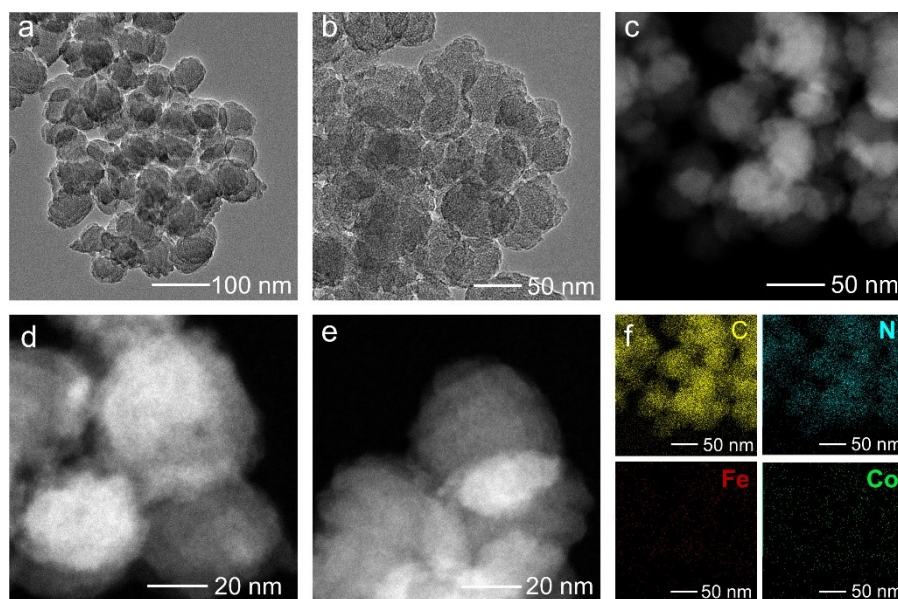

**Fig. S12.** (a,b) TEM images, (c-e) HAADF-STEM images and (f) corresponding EDX elemental images of FeCo/SMC-Ar.



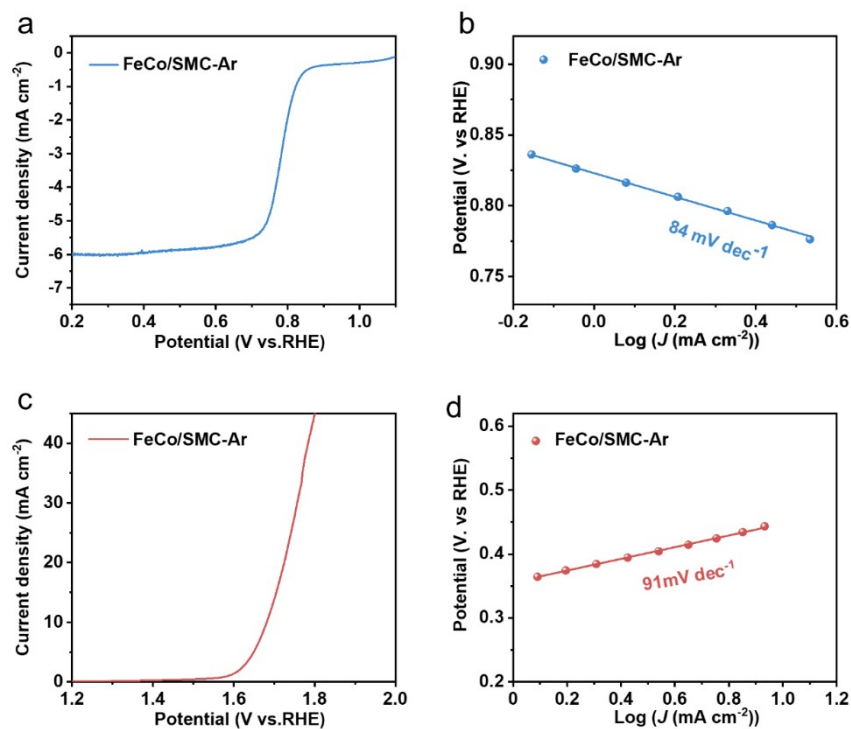

**Fig. S13.** (a) ORR LSV polarization curve and (b) Tafel slope of FeCo/SMC-Ar, (c) OER LSV polarization curve and (d) Tafel slope of FeCo/SMC-Ar.

**Table S1.** Textural parameters and chemical composition of FeCo/SMC and FeCo/SMC-Ar.

| Sample      | Textual properties                      |                                            | Chemical composition |          |          |
|-------------|-----------------------------------------|--------------------------------------------|----------------------|----------|----------|
|             | $S_{\text{BET}}$<br>(m <sup>2</sup> /g) | $V_{\text{total}}$<br>(cm <sup>3</sup> /g) | C<br>wt%             | N<br>wt% | H<br>wt% |
| FeCo/SMC    | 897                                     | 0.78                                       | 80.8                 | 9.0      | 2.0      |
| FeCo/SMC-Ar | 412                                     | 0.54                                       | 79.7                 | 7.3      | 2.1      |

**Table S2** Summary of bifunctional activities of carbon supported transition metal-based catalysts.

| No. | Catalysts                                 | $E_{1/2}$ (V vs RHE) | $E_{j=10}$ (V vs RHE) | $\Delta E$ ( $E_{j=10} - E_{1/2}$ ) (V vs RHE) | Reference                                                       |
|-----|-------------------------------------------|----------------------|-----------------------|------------------------------------------------|-----------------------------------------------------------------|
| 1   | FeCo/SMC                                  | 0.89                 | 1.609                 | 0.72                                           | This work                                                       |
| 2   | Co <sub>3</sub> Fe <sub>7</sub> /NC       | 0.85                 | 1.59                  | 0.74                                           | <i>Carbon Energy</i> , <b>2025</b> , 7, e682                    |
| 3   | Ag/Co/Co <sub>3</sub> O <sub>4</sub> @NC  | 0.853                | 1.563                 | 0.71                                           | <i>ChemPhysChem</i> <b>2025</b> , 26, e202500496                |
| 4   | Fe <sub>800</sub> -HZIF8                  | 0.84                 | 1.527                 | 0.687                                          | <i>J. Energy Storage</i> <b>2025</b> , 137, 118723              |
| 5   | P/Co-N-C-2                                | 0.80                 | 1.668                 | 0.86                                           | <i>J. Alloy. Compd.</i> <b>2025</b> , 1040, 183507              |
| 6   | FeCo/NC-7                                 | 0.92                 | 1.580                 | 0.66                                           | <i>J. Power Sources</i> <b>2025</b> , 644, 236996               |
| 7   | A-Co-Fe/NCF-CoNP                          | 0.89                 | 1.58                  | 0.69                                           | <i>Small</i> <b>2025</b> , 21, e06084                           |
| 8   | FeCo-NBC                                  | 0.88                 | 1.534                 | 0.66                                           | <i>ACS Sustainable Chem. Eng.</i> <b>2025</b> , 13, 13979       |
| 9   | CoFe@NC-5                                 | 0.84                 | 1.597                 | 0.757                                          | <i>Phys. Chem. Chem. Phys.</i> <b>2025</b> , 27, 14504          |
| 10  | CoFe-Co <sub>x</sub> N@NOALC              | 0.82                 | 1.702                 | 0.882                                          | <i>Chinese Chem. Lett.</i> <b>2025</b> , 36, 110403             |
| 11  | Fe-N-C/Gra-600                            | 0.862                | 1.743 V               | 0.881                                          | <i>ChemCatChem</i> <b>2025</b> , 17, e00731                     |
| 12  | Co-NSP-HPC                                | 0.898                | 1.590                 | 0.69                                           | <i>Appl. Catal. B-Environ. Energy</i> <b>2025</b> , 365, 124889 |
| 13  | (Fe <sub>3</sub> C, Fe <sub>3</sub> P)/NC | 0.85                 | 1.727                 | 0.88                                           | <i>ACS Appl. Energy Mater.</i> <b>2025</b> , 8, 529             |
| 14  | CoNi-NCNT                                 | 0.81                 | 1.52                  | 0.71                                           | <i>J. Colloid Interf. Sci.</i> <b>2025</b> , 683, 631           |
| 15  | B-Co/CoSe <sub>2</sub> @NSeC              | 0.865                | 1.600                 | 0.735                                          | <i>Appl. Catal. B-Environ. Energy</i> <b>2025</b> , 362, 124725 |
| 16  | MPFeNi@NC-900                             | 0.895                | 1.613                 | 0.718                                          | <i>J. Energy Storage</i> <b>2025</b> , 105, 114740              |
| 17  | FeN <sub>4</sub> /MoO <sub>x</sub>        | 0.902                | 1.567                 | 0.665                                          | <i>Adv. Funct. Mater.</i> <b>2025</b> , 35, 2416215             |
| 18  | P-FeNi-NPC                                | 0.845                | 1.55                  | 0.705                                          | <i>Small</i> <b>2025</b> , 21, 2402762                          |
| 19  | Co <sub>3</sub> S <sub>4</sub> @NCNT/NCHS | 0.80                 | 1.46                  | 0.66                                           | <i>J. Alloy. Compd.</i> <b>2024</b> , 1008, 176679              |
| 20  | CoFe-FeNC                                 | 0.876                | 1.526                 | 0.65                                           | <i>Appl. Catal. B-Environ. Energy</i> <b>2024</b> , 359, 124485 |
| 21  | FeCo <sub>5</sub> -NC                     | 0.908                | 1.670                 | 0.762                                          | <i>Electroanal. Chem.</i> <b>2024</b> , 965, 118369             |
| 22  | FeMn-N/S-C-1000                           | 0.924                | 1.617                 | 0.693                                          | <i>J. Energy Chem.</i> <b>2024</b> , 90, 610                    |

Table S2 (contd.)

| No. | Catalysts                                | $E_{1/2}$ (V vs RHE) | $E_{j=10}$ (V vs RHE) | $\Delta E$ ( $E_{j=10} - E_{1/2}$ ) (V vs RHE) | Reference                                                 |
|-----|------------------------------------------|----------------------|-----------------------|------------------------------------------------|-----------------------------------------------------------|
| 23  | FeCo/N-CF                                | 0.886                | 1.672                 | 0.786                                          | <i>J. Energy Chem.</i> <b>2023</b> , 76, 470              |
| 24  | Co <sub>14</sub> Fe <sub>1</sub> -CNTF   | 0.82                 | 1.480                 | 0.66                                           | <i>Adv. Mater. Interfaces</i> <b>2023</b> , 10, 2201817   |
| 25  |                                          | 0.925                | 1.623                 | 0.698                                          | <i>Angew. Chem. Int. Ed.</i> <b>2023</b> , 62, e202219191 |
| 26  | CoP <sub>3</sub> /-CeO <sub>2</sub> /C-2 | 0.752                | 1.569                 | 0.817                                          | <i>Appl. Catal. B-Environ.</i> <b>2023</b> , 321, 122029  |
| 27  | CoNi@NCNTs/CC                            | 0.82                 | 1.56                  | 0.74                                           | <i>Appl. Catal. B-Environ.</i> <b>2022</b> , 317, 121764  |
| 28  | NiFe@C@Co CNFs                           | 0.87                 | 1.600                 | 0.73                                           | <i>Small</i> <b>2022</b> , 18, 2200578                    |
| 29  | 3D Co/N-C                                | 0.84                 | 1.56                  | 0.72                                           | <i>Chem. Eng. J.</i> <b>2022</b> , 433, 134500            |
| 30  | Co-N-CCNFMs                              | 0.84                 | 1.559                 | 0.719                                          | <i>Energy Storage Mater.</i> <b>2022</b> , 47, 365        |
| 31  | Fe-Mo-N-C/800                            | 0.856                | 1.66                  | 0.804                                          | <i>Chem. Eng. J.</i> <b>2022</b> , 449, 137705            |
| 32  | FeCo-NC                                  | 0.877                | 1.579                 | 0.702                                          | <i>ACS Catal.</i> <b>2022</b> , 12, 1216                  |
| 33  | Co-CoN <sub>4</sub> @NCNs                | 0.83                 | 1.54                  | 0.71                                           | <i>Adv. Funct. Mater.</i> <b>2022</b> , 32, 2207331       |
| 34  | D-Co@NC                                  | 0.852                | 1.718                 | 0.866                                          | <i>Chem. Eng. J.</i> <b>2022</b> , 431, 133734            |
| 35  | FeCo-1/NSC                               | 0.82                 | 1.555                 | 0.735                                          | <i>J. Energy Chem.</i> <b>2021</b> , 56, 64               |
| 36  | FeNi/N-LCN                               | 0.835                | 1.57                  | 0.735                                          | <i>Nano Lett.</i> <b>2021</b> , 21, 3098                  |
| 37  | FeNi/N-C-900                             | 0.81                 | 1.643                 | 0.833                                          | <i>Chem Asian J.</i> <b>2021</b> , 16, 1592               |
